# Supplementary material for: Outcomes from the First European Planetary Health Hub Convening at ARTIS in Amsterdam
Source: MDPI journal article supplement (doi:10.3390/challe14030033), 2023-07-14
Supplement: s1 [file s1]

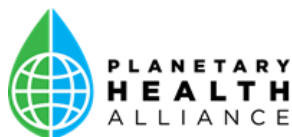

# ARTIS

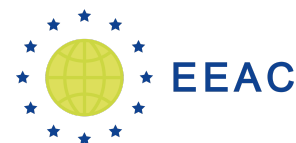

## Amsterdam Planetary Health European Hub Convening Agenda

### September 26<sup>th</sup> (Day 1)

**08:30 09:00** Welcome Coffee and Check-in **Planetarium Café**

**09:00 10:00** Welcome by the hosts\* **Planetarium**  
& Planetarium performance: 'Everything is connected'

*Session will be livestreamed (NOTE: 'Everything is connected' will not be viewable, but can be listened to online)*

**10:00 10:15** Coffee Break **Kings Room**

**10:15 11:25** Plenary Introduction: The need for a European Hub\* **Kings Room**  
*Why are we here, and what is at stake?*  
*What are you bringing to the Hub?*

*NOTE: online participants should have a piece of paper and crayons/markers available*

**11:25 12:50** Plenary: Conceptualizing the Hub\* **Kings Room**  
*How can the European Hub catalyze transformational change?*  
→Where do we need to go and how do we get there?  
→Vision, mission, priorities, and main tasks of the Hub

**12:50 14:00** Lunch in the park **ARTIS Park**

**14:00 14:30** Plenary: Reflections & Announcements\* **Kings Room**

**14:30 16:20** Working group sessions: **Kings Room**  
Research, Education, and Policy  
1. *How does the working group contribute to the big picture of the Hub?*  
a. Finalize vision, mission, and priorities  
2. *What are the working group's plans to catalyze change?*  
a. Activities and expected outputs  
3. *What are the working group's next steps post-meeting?*

**16:20 16:50** Plenary: Recap working group sessions\* **Kings Room**  
& wrap up Day 1

**17:00 18:00** **Groote Museum visit**

**18:00** Departure to the NDSM wharf and dinner location (Pilek) by tram and ferry

**19:30** Dinner & Drinks **Pilek, NDSM wharf**

---

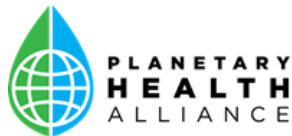

# ARTIS

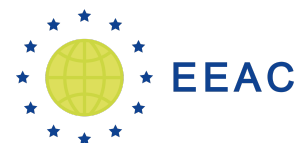

## September 27<sup>th</sup> (Day 2)

|              |              |                                                                                                                                                                                                                                                                                                                                                             |                         |
|--------------|--------------|-------------------------------------------------------------------------------------------------------------------------------------------------------------------------------------------------------------------------------------------------------------------------------------------------------------------------------------------------------------|-------------------------|
| <b>08:30</b> | <b>09:00</b> | Coffee & tea                                                                                                                                                                                                                                                                                                                                                | <b>Planetarium Café</b> |
| <b>9:00</b>  | <b>10:20</b> | Plenary: Sustaining the European Hub*<br>→Structure & Governance:<br><i>What are we looking for in a secretariat?</i><br><i>What is the Hub and the working group's coordination structure?</i><br><i>What is the selection process for the secretariat &amp; leadership?</i><br>→Exploring possible financing and fundraising opportunities and structures | <b>Planetarium</b>      |
| <b>10:20</b> | <b>10:30</b> | Coffee Break                                                                                                                                                                                                                                                                                                                                                | <b>Planetarium Café</b> |
| <b>10:30</b> | <b>11:00</b> | Plenary: Reflections on progress*<br>→Vision, mission, priorities, and tasks                                                                                                                                                                                                                                                                                | <b>Planetarium</b>      |
| <b>11:00</b> | <b>12:00</b> | Plenary: Sustaining the European Hub (continued)*<br>→Communicating the Hub externally<br>→Next steps                                                                                                                                                                                                                                                       | <b>Planetarium</b>      |
| <b>12:00</b> | <b>1:30</b>  | Lunch (Planetarium Café) & Visit Micropia<br>→Handout of artwork attendee certificates at Planetarium Café                                                                                                                                                                                                                                                  |                         |
| <b>1:30</b>  | <b>2:00</b>  | Closing Session*                                                                                                                                                                                                                                                                                                                                            | <b>Planetarium</b>      |

**END**

**\* = Sessions available for online viewing and/or participation**
